# Supplementary material
Source: PubMed Central journal article supplement (PMC7316570)
Supplement: EMS86649-supplement-Supplementary_Figures_and_Table.pdf [file EMS86649-supplement-Supplementary_Figures_and_Table.pdf]

| ETDRS   |        |       |         |         |         | E-ETDRS |        |       |         |         |         |
|---------|--------|-------|---------|---------|---------|---------|--------|-------|---------|---------|---------|
| Patient | Screen | Day 7 | Month 1 | Month 3 | Month 6 | Patient | Screen | Day 7 | Month 1 | Month 3 | Month 6 |
|         | 1      | 2     | 3       | 4       | 5       |         | 1      | 2     | 3       | 4       | 5       |
| 1       | 84     | 85    | 86      | 86      | 85      | 1 EVA   | 85     | 88    | 91      | 92      | 91      |
| 2       | 70     | 74    | 76      | 70      | 65      | 2 EVA   | 85     | 87    | 87      | 87      | 75      |
| 3       | 66     | 63    | 66      | 65      | 65      | 3 EVA   | 86     | 78    | 86      | 82      | 84      |
| 4       | 85     | 81    | 83      | 83      | 86      | 4 EVA   | 83     | 79    | 85      | 87      | 87      |
| 5       | 67     | 70    | 69      | 68      | 71      | 5 EVA   | 82     | 81    | 77      | 81      | 81      |
| 6       | 71     | 71    | 77      | 74      | 78      | 6 EVA   | 83     | 81    | 86      | 85      | 89      |
| 7       | 71     | 71    | 75      | 72      | 72      | 7 EVA   | 87     | 85    | 89      | 85      | 88      |
| 8       | 73     | 75    | 74      | 77      | 78      | 8 EVA   | 86     | 87    | 84      | 89      | 89      |
| 9       | 74     | 77    | 79      | 80      | 76      | 9 EVA   | 94     | 88    | 89      | 90      | 90      |
| 10      | 70     | 74    | 73      | 74      | 73      | 10 EVA  | 84     | 86    | 84      | 87      | 87      |
| 11      | 63     | 50    | 63      | 66      | 54      | 11 EVA  | 64     | 57    | 60      | 60      | 60      |
| 12      | 37     | 39    | 38      | 42      | 41      | 12 EVA  | 40     | 44    | 43      | 45      | 47      |
| 13      | 22     | 12    | 29      | 31      | 27      | 13 EVA  | 26     | 28    | 28      | 25      | 31      |
| 14      | 59     | 56    | 60      | 62      | 62      | 14 EVA  | 57     | 52    | 61      | 62      | 62      |

Supplementary Table 1: Longitudinal measurements with ETDRS charts and automated ETDRS (E-ETDRS) charts.

1  
2  
3  
4  
5  
6  
7  
8  
9  
10  
11  
12  
13  
14  
15  
16  
17  
18  
19  
20  
21  
22  
23  
24  
25  
26  
27  
28  
29  
30  
31  
32  
33  
34  
35  
36  
37  
38  
39  
40  
41  
42  
43  
44  
45  
46  
47  
48  
49  
50  
51  
52  
53  
54  
55  
56  
57  
58  
59  
60

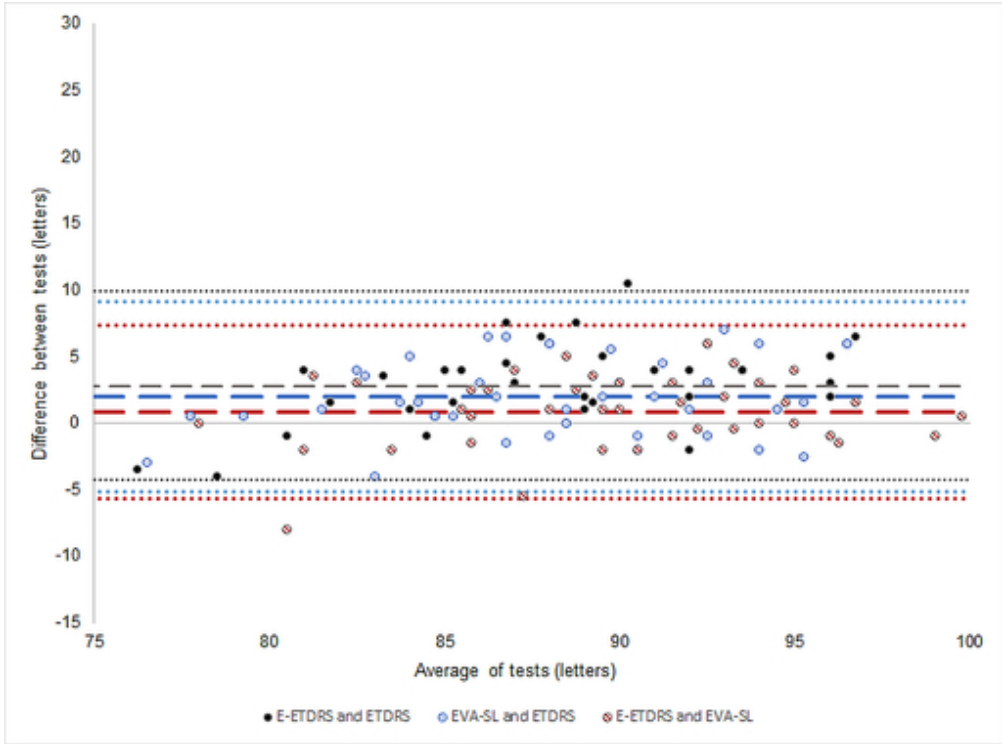

43x32mm (300 x 300 DPI)

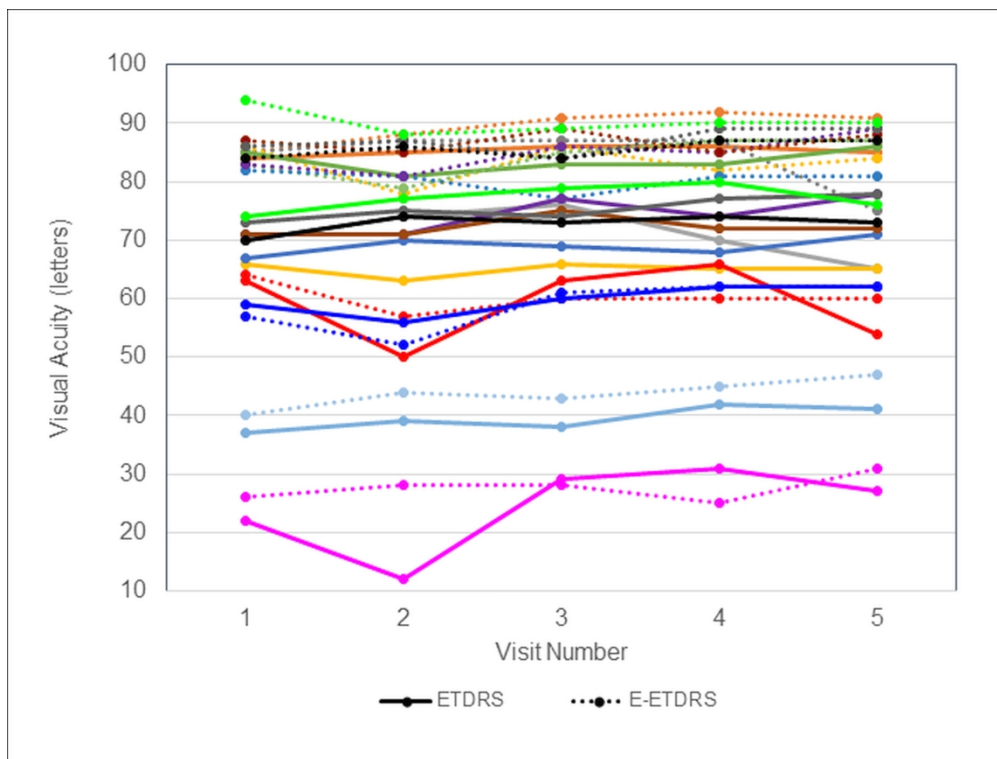

177x134mm (300 x 300 DPI)

1  
2  
3  
4  
5  
6  
7  
8  
9  
10  
11  
12  
13  
14  
15  
16  
17  
18  
19  
20  
21  
22  
23  
24  
25  
26  
27  
28  
29  
30  
31  
32  
33  
34  
35  
36  
37  
38  
39  
40  
41  
42  
43  
44  
45  
46  
47  
48  
49  
50  
51  
52  
53  
54  
55  
56  
57  
58  
59  
60

**Supplementary Figure 1:** Bland-Altman plot from figure 3B with adjusted X-axis to allow viewing of the scatter of points.

**Supplementary Figure 2:** Scatter graph VA results over 5 visits for 14 eyes with ETDRS results represented with solid lines and E-ETDRS results represented with dashed lines.
